# Supplementary material
Source: MDPI journal article supplement (https://www.mdpi.com/2073-4344/9/9/725)
Supplement: s1 [file s1]

# Supplementary Materials:

## Crystal-Plane Dependence of Nb-Doped Rutile $\text{TiO}_2$ Single Crystals on Photoelectrochemical Water Splitting

Tomohiko Nakajima \*, Takako Nakamura and Tetsuo Tsuchiya

Advanced Coating Technology Research Center, National Institute of Advanced Industrial Science and Technology,  
Tsukuba Central 5, 1-1-1 Higashi, Tsukuba, Ibaraki 305-8565, Japan.

\* Correspondence: t-nakajima@aist.go.jp

### Surface morphology of the aged samples

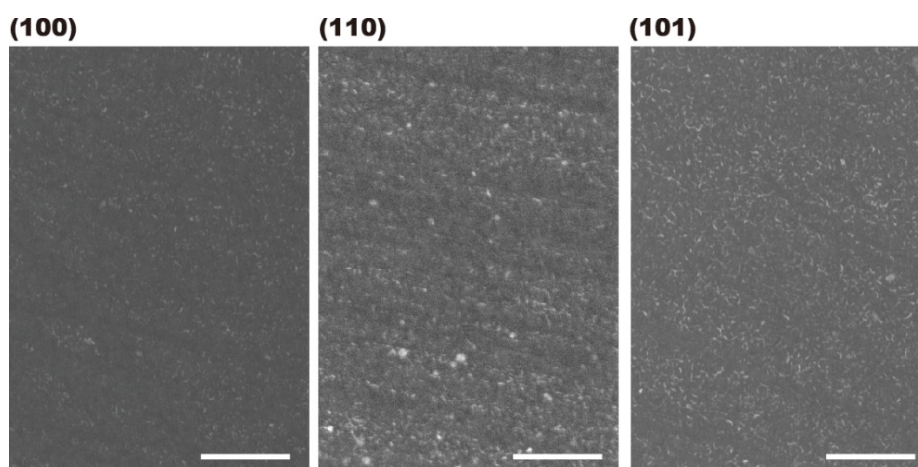

**Fig. S1:** The surface morphology for the (100)-, (110)- and (101)-planes of  $\text{TiO}_2\text{:Nb}$  substrates after the PEC reaction at 1.5  $V_{\text{RHE}}$  for 1 h in 1 M KOH electrolyte. The white scale bars represent 500 nm.

### Spectrum of illuminated simulated solar light

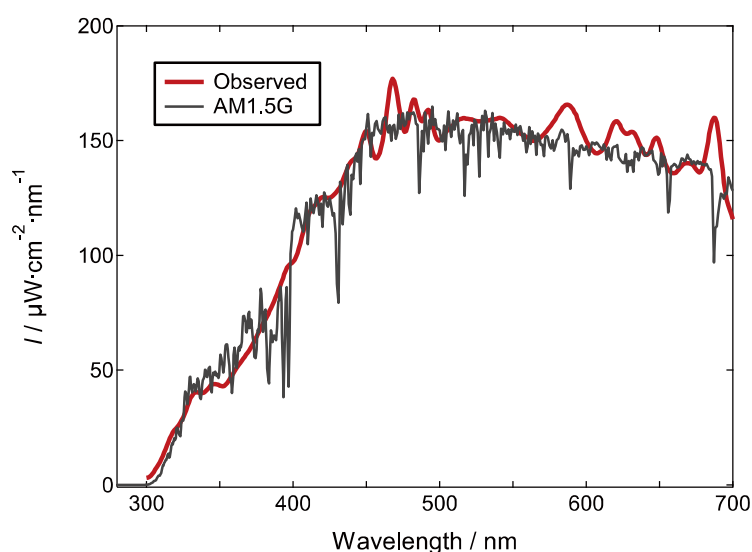

**Fig. S2:** The spectra for 100  $\text{mW}\cdot\text{cm}^{-2}$  AM1.5G (1 SUN) and simulated solar light used for the IPCE measurements
